# Supplementary material for: IL6 sensitizes prostate cancer to the antiproliferative effect of IFNα2 through IRF9
Source: PubMed Central journal article supplement (PMC3753051; doi:10.1530/erc-13-0222), 2013-08
Supplement: supp_ERC-13-0222_Supplementary_figure_1.pdf [file supp_ERC-13-0222_Supplementary_figure_1.pdf]

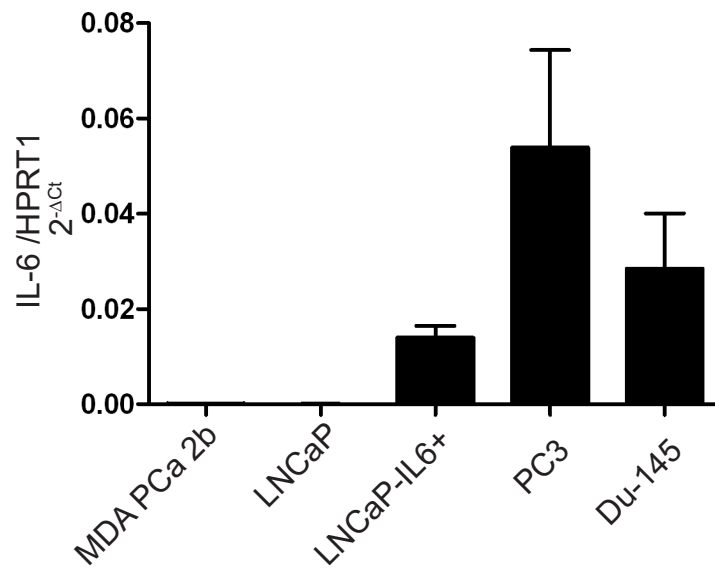

Fig.S1 Erb et al., 2013
